# Supplementary material
Source: PubMed Central journal article supplement (PMC7169721)
Supplement: TBED-64-698-s001.pdf [file TBED-64-698-s001.pdf]

**Table S1. Primers used in this study**

| Primer       | Sequence (5'-3')      | Position <sup>a</sup> | Product size |
|--------------|-----------------------|-----------------------|--------------|
| TGE-ORF3-F1  | CTGCTATTTTGCTGTTGT    | 24583-24600           | 1602         |
| TGE-ORF3-F2  | ATCAGACGCTGTGCTATT    | 26167-26184           |              |
| TGE-ORF3-F1n | ATATGCAGTAGAAGACAAT   | 24652-24670           | 1417         |
| TGE-ORF3-F2n | TTAGTTCAAACAAGGAGT    | 26051-26068           |              |
| TGEV-d-F1:   | ATATGCAGTAGAAGACAAT   | 24652-24670           | 420          |
| TGEV-d-F2:   | CAGTTTTTCTATAATCTCTCT | 25051-25071           |              |

<sup>a</sup>All of the positions are related to the published TGEV H16 sequence

**Table S2. Virus sequences used in the experiment**

| Strains              | Accession no. | Origin  | Release | Reference             |
|----------------------|---------------|---------|---------|-----------------------|
| TGEV 96-1933         | AF104420      | England | 2001    | Jones and Paton, 1996 |
| TGEV SC-Y            | DQ443743      | China   | 2006    | Song and Guo, 2008    |
| TGEV TS              | DQ201447      | China   | 2006    | Li et al., 2010       |
| TGEV TFI             | Z35758        | Taiwan  | 2006    | Chen et al., 1995     |
| PRCV ISU-1           | DQ811787      | America | 2009    | Zhang et al., 2007    |
| TGEV Miller M6       | DQ811785      | America | 2009    | Zhang et al., 2007    |
| TGEV Purdue P115     | DQ811788      | America | 2009    | Zhang et al., 2007    |
| TGEV TGEV H16        | FJ755618      | China   | 2010    | Wang et al., 2010     |
| TGEV attenuated H    | EU074218      | China   | 2010    | Wang et al., 2010     |
| TGEV virulent Purdue | DQ811789      | America | 2011    | Zhang et al., 2007    |
| TGEV Miller M60      | DQ811786      | America | 2011    | Zhang et al., 2007    |
| TGEV WH-1            | HQ462571      | China   | 2011    | Direct Submission     |
| PRCV OH7269          | KR270796      | America | 2015    | Wang and Zhang, 2015  |
| TGEV SHXB            | KP202848      | China   | 2015    | Weiwei et al., 2014   |
| TGEV-HX              | KC962433      | China   | 2015    | Hu et al., 2015       |

**Table S3. Positive samples collection in the experiment.**

| Strains | Accession no. | Province     |
|---------|---------------|--------------|
| CH-BJ   | KX532151      | Beijing      |
| CH-NM2  | KX532153      | Neimenggu    |
| CH-SDRZ | KX532154      | Shandong     |
| CH-SH   | KX532155      | Shanghai     |
| CH-SY   | KX532156      | Shenyang     |
| CH-ZB   | KX532157      | Shandong     |
| CH-MZL  | KX532158      | Heilongjiang |
| CH-LNCT | KX527917      | Shenyang     |
